# Supplementary material
Source: publisher figshare collection journal article supplement (https://sage.figshare.com/ndownloader/files/15073472)
Supplement: Supplementary file 1 [file 15073472]

## Appendix A

### Appendix A.1 Density of total crashes and fatal crashes in Philadelphia and suburban Pennsylvania counties from 2010 to 2014.

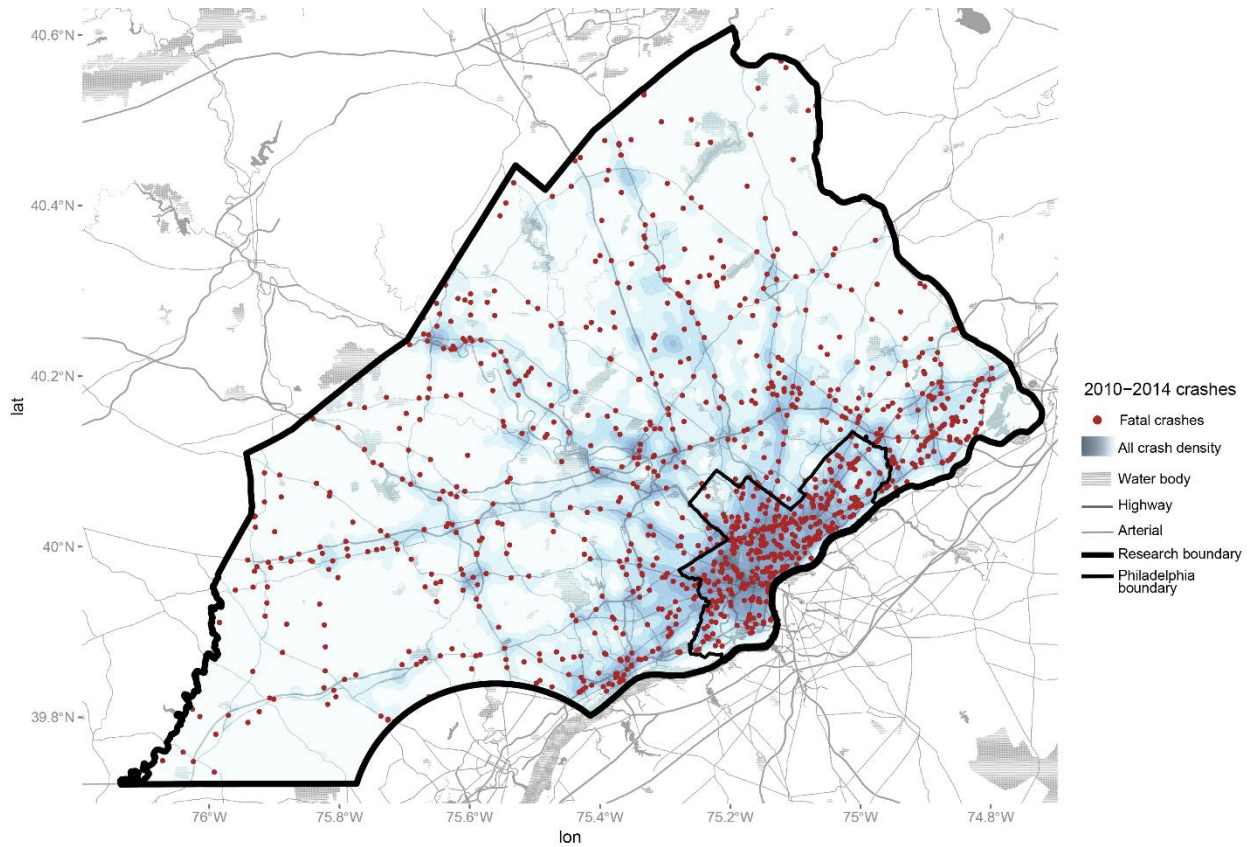

## Appendix A.2 Density of pedestrian crashes and pedestrian fatalities in Philadelphia and suburban Pennsylvania counties from 2010 to 2014.

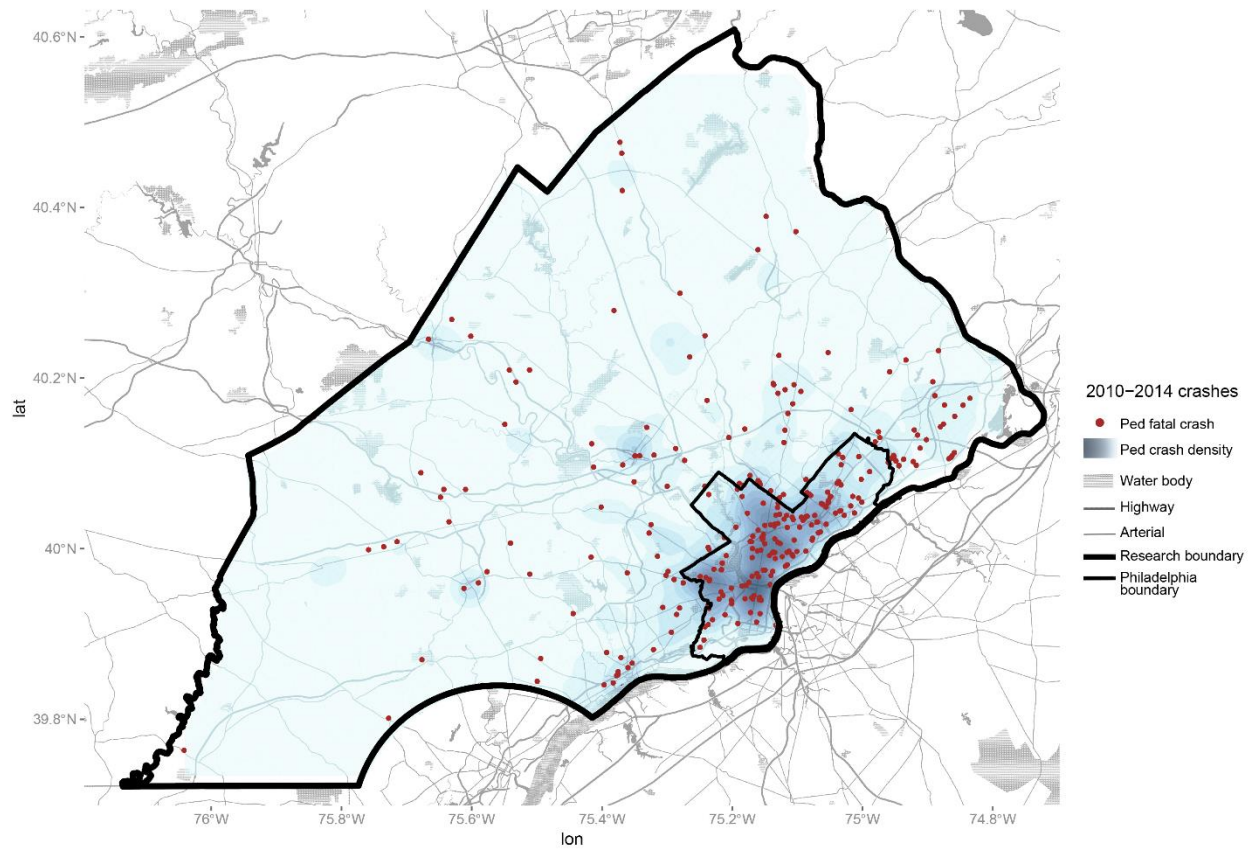

## Appendix B

### Appendix B.1 Random intercept multilevel negative binomial models of total crashes by segment/intersection in the Philadelphia region

|                                                                  | Control levels               |                    |                    |                    |                    |                    |
|------------------------------------------------------------------|------------------------------|--------------------|--------------------|--------------------|--------------------|--------------------|
|                                                                  | None                         | Demographics       | Roadway            | Exposure           | Land use           | Full               |
|                                                                  | Estimate<br>(standard error) |                    |                    |                    |                    |                    |
| <i>Population density (log)</i><br><i>in Philadelphia</i>        | -0.15***<br>(0.02)           | -0.20***<br>(0.02) | -0.07***<br>(0.02) | -0.10***<br>(0.02) | -0.09***<br>(0.02) | -0.10***<br>(0.02) |
| <i>Population density (log)</i><br><i>in suburbs</i>             | 0.01<br>(0.02)               | -0.04<br>(0.02)    | 0.08***<br>(0.02)  | -0.004<br>(0.02)   | -0.03<br>(0.02)    | -0.06**<br>(0.02)  |
| <i>Proportion of black</i><br><i>residents (log)</i>             |                              | 0.06**<br>(0.02)   | 0.07***<br>(0.02)  | 0.07***<br>(0.02)  | 0.06***<br>(0.02)  | 0.07***<br>(0.02)  |
| <i>Proportion of families in</i><br><i>poverty (log)</i>         |                              | 0.09***<br>(0.03)  | 0.08***<br>(0.02)  | 0.08***<br>(0.02)  | 0.07**<br>(0.02)   | 0.08***<br>(0.02)  |
| <i>Proportion of residents</i><br><i>over 64 (log)</i>           |                              | 0.02<br>(0.04)     | -0.08*<br>(0.03)   | -0.08**<br>(0.03)  | -0.09**<br>(0.03)  | -0.08**<br>(0.03)  |
| <i>Jobs per acre (log)</i>                                       |                              |                    |                    |                    |                    | 0.06**<br>(0.02)   |
| <i>Land use diversity</i>                                        |                              |                    |                    |                    | 0.06***<br>(0.02)  | 0.03<br>(0.02)     |
| <i>Public school enrollments</i><br><i>(log)</i>                 |                              |                    |                    |                    | -0.005<br>(0.004)  | -0.002<br>(0.004)  |
| <i>Street link-to-node ratio</i>                                 |                              |                    |                    |                    | -0.29***<br>(0.07) | -0.27***<br>(0.07) |
| <i>Pedestrian exposure (log)</i>                                 |                              |                    |                    | 0.17***<br>(0.02)  | 0.16***<br>(0.02)  | 0.11***<br>(0.02)  |
| Average annual daily<br>traffic (log)                            |                              |                    |                    | 0.35***<br>(0.003) | 0.35***<br>(0.003) | 0.35***<br>(0.003) |
| Speed limit (reference<br>category: 25 mph and low<br>frequency) |                              |                    |                    |                    |                    |                    |
| None available                                                   |                              |                    | 0.11***<br>(0.02)  | 0.04<br>(0.02)     | 0.04<br>(0.02)     | 0.04<br>(0.02)     |
| 35 mph                                                           |                              |                    | 1.26***<br>(0.01)  | 0.97***<br>(0.01)  | 0.97***<br>(0.01)  | 0.96***<br>(0.01)  |
| 45 mph                                                           |                              |                    | 1.61***<br>(0.06)  | 1.14***<br>(0.06)  | 1.14***<br>(0.06)  | 1.14***<br>(0.06)  |
| 55 & 65 mph                                                      |                              |                    | 1.69***<br>(0.03)  | 1.09***<br>(0.03)  | 1.09***<br>(0.03)  | 1.08***<br>(0.03)  |
| Roadway segment length<br>(in feet)                              |                              |                    | 1.05***<br>(0.01)  | 1.03***<br>(0.01)  | 1.03***<br>(0.01)  | 1.03***<br>(0.01)  |
| Length (in feet) of limited<br>access highways (log)             |                              |                    | 0.13***<br>(0.01)  | 0.15***<br>(0.01)  | 0.15***<br>(0.01)  | 0.15***<br>(0.01)  |
| Length (in feet) of<br>secondary highways (log)                  |                              |                    | 0.17***<br>(0.01)  | 0.15***<br>(0.01)  | 0.15***<br>(0.01)  | 0.15***<br>(0.01)  |
| Length (in feet) of major<br>arterials (log)                     |                              |                    | 0.04***<br>(0.004) | 0.04***<br>(0.003) | 0.04***<br>(0.003) | 0.04***<br>(0.003) |
| Length (in feet) of<br>secondary highways: one<br>way (log)      |                              |                    | -0.06***<br>(0.01) | -0.02<br>(0.01)    | -0.02<br>(0.01)    | -0.02<br>(0.01)    |
| Length (in feet) of major<br>arterials: one way (log)            |                              |                    | 0.04***<br>(0.01)  | 0.04***<br>(0.01)  | 0.04***<br>(0.01)  | 0.04***<br>(0.01)  |
| AADT missing dummy                                               |                              |                    | -2.43***<br>(0.03) | 0.01<br>(0.04)     | 0.01<br>(0.04)     | 0.01<br>(0.04)     |
| Intersection dummy                                               |                              |                    | 7.02***            | 6.74***            | 6.74***            | 6.75***            |

|                        |          |          |          |           |           |           |
|------------------------|----------|----------|----------|-----------|-----------|-----------|
|                        |          |          | (0.05)   | (0.05)    | 0.05)     | (0.05)    |
| Philadelphia intercept | 0.80***  | 0.68***  | 0.72***  | 0.45***   | 0.37***   | 0.35***   |
|                        | (0.07)   | (0.08)   | (0.07)   | (0.07)    | (0.07)    | (0.07)    |
| Constant               | -0.64*** | -0.86*** | -8.07*** | -11.33*** | -10.64*** | -10.37*** |
|                        | (0.03)   | (0.12)   | (0.12)   | (0.17)    | (0.22)    | (0.23)    |
| AIC                    | 445,859  | 445,826  | 395,946  | 384,143   | 384,123   | 384,114   |
| BIC                    | 445,921  | 445,920  | 396,165  | 384,383   | 384,393   | 384,395   |

Significance levels: < 0.001 \*\*\*, < 0.01 \*\*, < 0.05 \*

Variables in *italic* are measured on Census tract level as opposed to segment/intersection level

## Appendix B.2 Random intercept multilevel negative binomial models of serious injuries by segment/intersection in the Philadelphia region

|                                                                  | Control levels               |                    |                   |                    |                    |                    |
|------------------------------------------------------------------|------------------------------|--------------------|-------------------|--------------------|--------------------|--------------------|
|                                                                  | None                         | Demographics       | Roadway           | Exposure           | Land use           | Full               |
|                                                                  | Estimate<br>(standard error) |                    |                   |                    |                    |                    |
| <i>Population density (log)<br/>in Philadelphia</i>              | -0.17***<br>(0.03)           | -0.26***<br>(0.03) | -0.15<br>(0.11)   | -0.11***<br>(0.03) | -0.11***<br>(0.03) | -0.10***<br>(0.03) |
| <i>Population density (log)<br/>in suburbs</i>                   | -0.13***<br>(0.03)           | -0.22***<br>(0.03) | -0.09<br>(0.09)   | -0.10**<br>(0.03)  | -0.10**<br>(0.04)  | -0.08*<br>(0.04)   |
| <i>Proportion of black<br/>residents (log)</i>                   |                              | 0.07*<br>(0.03)    | 0.12<br>(0.09)    | 0.09**<br>(0.03)   | 0.09**<br>(0.03)   | 0.08**<br>(0.03)   |
| <i>Proportion of families in<br/>poverty (log)</i>               |                              | 0.23***<br>(0.04)  | 0.22<br>(0.13)    | 0.21***<br>(0.04)  | 0.20***<br>(0.04)  | 0.19***<br>(0.04)  |
| <i>Proportion of residents<br/>over 64 (log)</i>                 |                              | -0.05<br>(0.06)    | -0.13<br>(0.19)   | -0.18***<br>(0.05) | -0.18***<br>(0.05) | -0.19***<br>(0.05) |
| <i>Jobs per acre (log)</i>                                       |                              |                    |                   |                    |                    | -0.05<br>(0.04)    |
| <i>Land use diversity</i>                                        |                              |                    |                   |                    | 0.03<br>(0.03)     | 0.05<br>(0.03)     |
| <i>Public school enrollments<br/>(log)</i>                       |                              |                    |                   |                    | 0.0005<br>(0.01)   | -0.002<br>(0.01)   |
| <i>Street link-to-node ratio</i>                                 |                              |                    |                   |                    | -0.03<br>(0.13)    | -0.05<br>(0.13)    |
| <i>Pedestrian exposure (log)</i>                                 |                              |                    |                   | 0.06<br>(0.03)     | 0.05<br>(0.04)     | 0.08<br>(0.05)     |
| Average annual daily<br>traffic (log)                            |                              |                    |                   | 0.32***<br>(0.01)  | 0.32***<br>(0.01)  | 0.32***<br>(0.01)  |
| Speed limit (reference<br>category: 25 mph and low<br>frequency) |                              |                    |                   |                    |                    |                    |
| None available                                                   |                              |                    | -0.28<br>(0.30)   | 0.08<br>(0.10)     | 0.08<br>(0.10)     | 0.08<br>(0.10)     |
| 35 mph                                                           |                              |                    | 1.07***<br>(0.23) | 0.77***<br>(0.05)  | 0.76***<br>(0.05)  | 0.77***<br>(0.05)  |
| 45 mph                                                           |                              |                    | 1.99<br>(1.06)    | 1.06***<br>(0.18)  | 1.06***<br>(0.18)  | 1.05***<br>(0.18)  |
| 55 & 65 mph                                                      |                              |                    | 1.68**<br>(0.52)  | 0.89***<br>(0.09)  | 0.89***<br>(0.09)  | 0.89***<br>(0.09)  |
| Roadway segment length<br>(in feet)                              |                              |                    | 1.02***<br>(0.11) | 1.09***<br>(0.03)  | 1.09***<br>(0.03)  | 1.09***<br>(0.03)  |
| Length (in feet) of limited<br>access highways (log)             |                              |                    | 0.10<br>(0.12)    | 0.05**<br>(0.02)   | 0.05**<br>(0.02)   | 0.05**<br>(0.02)   |
| Length (in feet) of<br>secondary highways (log)                  |                              |                    | 0.20*<br>(0.09)   | 0.09***<br>(0.02)  | 0.09***<br>(0.02)  | 0.09***<br>(0.02)  |
| Length (in feet) of major                                        |                              |                    | 0.07              | 0.03**             | 0.03**             | 0.03**             |

|                                                             |                    |                    |                     |                     |                     |                     |
|-------------------------------------------------------------|--------------------|--------------------|---------------------|---------------------|---------------------|---------------------|
| arterials (log)                                             |                    |                    | (0.06)              | (0.01)              | (0.01)              | (0.01)              |
| Length (in feet) of<br>secondary highways: one<br>way (log) |                    |                    | 0.04<br>(0.21)      | 0.0002<br>(0.03)    | 0.0002<br>(0.03)    | 0.0002<br>(0.03)    |
| Length (in feet) of major<br>arterials: one way (log)       |                    |                    | 0.03<br>(0.16)      | 0.02<br>(0.02)      | 0.02<br>(0.02)      | 0.02<br>(0.02)      |
| AADT missing dummy                                          |                    |                    | -2.50***<br>(0.35)  | -0.21<br>(0.21)     | -0.21<br>(0.21)     | -0.20<br>(0.21)     |
| Intersection dummy                                          |                    |                    | 6.59***<br>(0.66)   | 7.01***<br>(0.21)   | 7.01***<br>(0.21)   | 7.00***<br>(0.21)   |
| Philadelphia intercept                                      | 0.90***<br>(0.10)  | 0.67***<br>(0.10)  | 0.70<br>(0.39)      | 0.55***<br>(0.11)   | 0.56***<br>(0.12)   | 0.58***<br>(0.12)   |
| Constant                                                    | -4.32***<br>(0.04) | -4.55***<br>(0.18) | -11.49***<br>(0.90) | -14.26***<br>(0.37) | -14.09***<br>(0.44) | -14.30***<br>(0.47) |
| AIC                                                         | 36,600             | 36,535             | 46,628              | 32,048              | 32,053              | 32,053              |
| BIC                                                         | 36,662             | 36,629             | 46,847              | 32,288              | 32,324              | 32,334              |

Significance levels: < 0.001 \*\*\*, < 0.01 \*\*, < 0.05 \*

Variables in *italic* are measured on Census tract level as opposed to segment/intersection level

### Appendix B.3 Random intercept multilevel negative binomial models of total fatalities by segment/intersection in the Philadelphia region

|                                                                  | Control levels               |                    |                    |                    |                    |                    |
|------------------------------------------------------------------|------------------------------|--------------------|--------------------|--------------------|--------------------|--------------------|
|                                                                  | None                         | Demographics       | Roadway            | Exposure           | Land use           | Full               |
|                                                                  | Estimate<br>(standard error) |                    |                    |                    |                    |                    |
| <i>Population density (log)<br/>in Philadelphia</i>              | -0.26***<br>(0.03)           | -0.36***<br>(0.04) | -0.18***<br>(0.04) | -0.16***<br>(0.04) | -0.13***<br>(0.04) | -0.13***<br>(0.04) |
| <i>Population density (log)<br/>in suburbs</i>                   | -0.15***<br>(0.04)           | -0.23***<br>(0.04) | -0.03<br>(0.05)    | -0.02<br>(0.05)    | -0.03<br>(0.05)    | 0.01<br>(0.06)     |
| <i>Proportion of black<br/>residents (log)</i>                   |                              | 0.09<br>(0.05)     | 0.09*<br>(0.04)    | 0.10*<br>(0.04)    | 0.08.<br>(0.04)    | 0.07<br>(0.04)     |
| <i>Proportion of families in<br/>poverty (log)</i>               |                              | 0.20**<br>(0.06)   | 0.20***<br>(0.06)  | 0.20***<br>(0.06)  | 0.14*<br>(0.06)    | 0.12*<br>(0.06)    |
| <i>Proportion of residents<br/>over 64 (log)</i>                 |                              | 0.13<br>(0.09)     | 0.02<br>(0.08)     | -0.01<br>(0.08)    | -0.02<br>(0.08)    | -0.03<br>(0.08)    |
| <i>Jobs per acre (log)</i>                                       |                              |                    |                    |                    |                    | -0.08<br>(0.05)    |
| <i>Land use diversity</i>                                        |                              |                    |                    |                    | 0.17***<br>(0.04)  | 0.21***<br>(0.05)  |
| <i>Public school enrollments<br/>(log)</i>                       |                              |                    |                    |                    | 0.005<br>(0.01)    | 0.002<br>(0.01)    |
| <i>Street link-to-node ratio</i>                                 |                              |                    |                    |                    | -0.30<br>(0.20)    | -0.34<br>(0.20)    |
| <i>Pedestrian exposure (log)</i>                                 |                              |                    |                    | -0.03<br>(0.05)    | -0.10<br>(0.05)    | -0.03<br>(0.07)    |
| Average annual daily<br>traffic (log)                            |                              |                    |                    | 0.31***<br>(0.02)  | 0.31***<br>(0.02)  | 0.31***<br>(0.02)  |
| Speed limit (reference<br>category: 25 mph and low<br>frequency) |                              |                    |                    |                    |                    |                    |
| None available                                                   |                              |                    | 0.59***<br>(0.14)  | 0.45**<br>(0.14)   | 0.44**<br>(0.14)   | 0.44**<br>(0.14)   |
| 35 mph                                                           |                              |                    | 0.95***<br>(0.09)  | 0.70***<br>(0.09)  | 0.69***<br>(0.09)  | 0.70***<br>(0.09)  |
| 45 mph                                                           |                              |                    | 1.85***<br>(0.24)  | 1.49***<br>(0.24)  | 1.50***<br>(0.24)  | 1.49***<br>(0.24)  |

|                                                             |                    |                    |                     |                     |                     |                     |
|-------------------------------------------------------------|--------------------|--------------------|---------------------|---------------------|---------------------|---------------------|
| 55 & 65 mph                                                 |                    |                    | 1.46***<br>(0.15)   | 0.88***<br>(0.15)   | 0.85***<br>(0.15)   | 0.86***<br>(0.15)   |
| Roadway segment length<br>(in feet)                         |                    |                    | 1.13***<br>(0.05)   | 1.11***<br>(0.05)   | 1.12***<br>(0.05)   | 1.11***<br>(0.05)   |
| Length (in feet) of limited<br>access highways (log)        |                    |                    | 0.07**<br>(0.03)    | 0.04<br>(0.03)      | 0.04<br>(0.03)      | 0.04<br>(0.03)      |
| Length (in feet) of<br>secondary highways (log)             |                    |                    | 0.14***<br>(0.02)   | 0.11***<br>(0.02)   | 0.11***<br>(0.02)   | 0.11***<br>(0.02)   |
| Length (in feet) of major<br>arterials (log)                |                    |                    | 0.07***<br>(0.02)   | 0.06**<br>(0.02)    | 0.06**<br>(0.02)    | 0.06**<br>(0.02)    |
| Length (in feet) of<br>secondary highways: one<br>way (log) |                    |                    | 0.06<br>(0.04)      | 0.06<br>(0.03)      | 0.06<br>(0.03)      | 0.06<br>(0.03)      |
| Length (in feet) of major<br>arterials: one way (log)       |                    |                    | 0.05<br>(0.04)      | 0.02<br>(0.04)      | 0.02<br>(0.04)      | 0.02<br>(0.04)      |
| AADT missing dummy                                          |                    |                    | -2.19***<br>(0.30)  | -0.01<br>(0.32)     | -0.04<br>(0.32)     | -0.03<br>(0.32)     |
| Intersection dummy                                          |                    |                    | 7.26***<br>(0.34)   | 6.95***<br>(0.34)   | 6.97***<br>(0.34)   | 6.94***<br>(0.34)   |
| Philadelphia intercept                                      | 1.18***<br>(0.13)  | 1.03***<br>(0.14)  | 1.15***<br>(0.13)   | 1.09***<br>(0.15)   | 1.11***<br>(0.16)   | 1.15***<br>(0.16)   |
| Constant                                                    | -5.49***<br>(0.06) | -6.22***<br>(0.27) | -13.84***<br>(0.44) | -15.42***<br>(0.57) | -14.27***<br>(0.67) | -14.62***<br>(0.71) |
| AIC                                                         | 14,640             | 14,619             | 13,141              | 12,840              | 12,829              | 12,829              |
| BIC                                                         | 14,702             | 14,713             | 13,360              | 13,080              | 13,100              | 13,110              |

Significance levels: < 0.001 \*\*\*, < 0.01 \*\*, < 0.05 \*

Variables in *italic* are measured on Census tract level as opposed to segment/intersection level

#### Appendix B.4 Random intercept multilevel negative binomial models of pedestrian involved crashes by segment/intersection in the Philadelphia region

|                                                     | Control levels               |                    |                    |                    |                   |                    |
|-----------------------------------------------------|------------------------------|--------------------|--------------------|--------------------|-------------------|--------------------|
|                                                     | None                         | Demographics       | Roadway            | Exposure           | Land use          | Full               |
|                                                     | Estimate<br>(standard error) |                    |                    |                    |                   |                    |
| <i>Population density (log)<br/>in Philadelphia</i> | 0.06<br>(0.05)               | -0.01<br>(0.03)    | 0.07**<br>(0.02)   | 0.003<br>(0.02)    | -0.02<br>(0.09)   | -0.02<br>(0.02)    |
| <i>Population density (log)<br/>in suburbs</i>      | 0.76***<br>(0.05)            | 0.62***<br>(0.04)  | 0.70***<br>(0.03)  | 0.58***<br>(0.03)  | 0.45***<br>(0.10) | 0.47***<br>(0.04)  |
| <i>Proportion of black<br/>residents (log)</i>      |                              | 0.12***<br>(0.03)  | 0.12***<br>(0.02)  | 0.13***<br>(0.02)  | 0.16*<br>(0.07)   | 0.13***<br>(0.02)  |
| <i>Proportion of families in<br/>poverty (log)</i>  |                              | 0.20***<br>(0.04)  | 0.22***<br>(0.03)  | 0.21***<br>(0.03)  | 0.19<br>(0.10)    | 0.22***<br>(0.03)  |
| <i>Proportion of residents<br/>over 64 (log)</i>    |                              | -0.21***<br>(0.05) | -0.24***<br>(0.05) | -0.21***<br>(0.04) | -0.25<br>(0.16)   | -0.19***<br>(0.04) |
| <i>Jobs per acre (log)</i>                          |                              |                    |                    |                    |                   | 0.11***<br>(0.03)  |
| <i>Land use diversity</i>                           |                              |                    |                    |                    | 0.13<br>(0.07)    | 0.04<br>(0.03)     |
| <i>Public school enrollments<br/>(log)</i>          |                              |                    |                    |                    | -0.02<br>(0.02)   | -0.01<br>(0.01)    |
| <i>Street link-to-node ratio</i>                    |                              |                    |                    |                    | -0.45<br>(0.36)   | -0.67***<br>(0.11) |
| <i>Pedestrian exposure (log)</i>                    |                              |                    |                    | 0.33***<br>(0.03)  | 0.32***<br>(0.09) | 0.24***<br>(0.04)  |
| Average annual daily<br>traffic (log)               |                              |                    |                    | 0.26***<br>(0.01)  | 0.28***<br>(0.05) | 0.26***<br>(0.01)  |

Speed limit (reference category: 25 mph and low frequency)

|                                                       |                    |                    |                     |                     |                     |                     |
|-------------------------------------------------------|--------------------|--------------------|---------------------|---------------------|---------------------|---------------------|
| None available                                        |                    |                    | 0.06<br>(0.06)      | 0.01<br>(0.06)      | -0.34<br>(0.23)     | 0.01<br>(0.06)      |
| 35 mph                                                |                    |                    | 0.89***<br>(0.03)   | 0.70***<br>(0.03)   | 0.82***<br>(0.18)   | 0.69***<br>(0.03)   |
| 45 mph                                                |                    |                    | 1.36***<br>(0.15)   | 1.04***<br>(0.15)   | 1.12<br>(0.84)      | 1.06***<br>(0.15)   |
| 55 & 65 mph                                           |                    |                    | 1.03***<br>(0.08)   | 0.50***<br>(0.08)   | 0.55<br>(0.42)      | 0.49***<br>(0.08)   |
| Roadway segment length (in feet)                      |                    |                    | 0.85***<br>(0.02)   | 0.87***<br>(0.02)   | 0.91***<br>(0.08)   | 0.87***<br>(0.02)   |
| Length (in feet) of limited access highways (log)     |                    |                    | -0.06**<br>(0.02)   | -0.12***<br>(0.02)  | -0.05<br>(0.09)     | -0.12***<br>(0.02)  |
| Length (in feet) of secondary highways (log)          |                    |                    | 0.16***<br>(0.01)   | 0.13***<br>(0.01)   | 0.13<br>(0.07)      | 0.13***<br>(0.01)   |
| Length (in feet) of major arterials (log)             |                    |                    | 0.09***<br>(0.01)   | 0.07***<br>(0.01)   | 0.06<br>(0.04)      | 0.07***<br>(0.01)   |
| Length (in feet) of secondary highways: one way (log) |                    |                    | -0.05*<br>(0.02)    | -0.03<br>(0.02)     | 0.02<br>(0.16)      | -0.03<br>(0.02)     |
| Length (in feet) of major arterials: one way (log)    |                    |                    | 0.01<br>(0.02)      | -0.01<br>(0.02)     | -0.01<br>(0.12)     | -0.01<br>(0.02)     |
| AADT missing dummy                                    |                    |                    | -1.68***<br>(0.13)  | 0.10<br>(0.14)      | 0.01<br>(0.40)      | 0.11<br>(0.14)      |
| Intersection dummy                                    |                    |                    | 6.07***<br>(0.14)   | 5.97***<br>(0.14)   | 5.83***<br>(0.50)   | 5.98***<br>(0.14)   |
| Philadelphia intercept                                | 3.15***<br>(0.17)  | 2.67***<br>(0.11)  | 2.73***<br>(0.10)   | 2.24***<br>(0.10)   | 2.18***<br>(0.34)   | 1.99***<br>(0.10)   |
| Constant                                              | -5.27***<br>(0.07) | -5.14***<br>(0.17) | -11.19***<br>(0.22) | -15.23***<br>(0.30) | -14.32***<br>(1.20) | -13.38***<br>(0.36) |
| AIC                                                   | 99,091             | 73,857             | 67,104              | 65,804              | 111,996             | 65,740              |
| BIC                                                   | 99,154             | 73,950             | 67,322              | 66,044              | 112,267             | 66,021              |

Significance levels: < 0.001 \*\*\*, < 0.01 \*\*, < 0.05 \*

Variables in *italic* are measured on Census tract level as opposed to segment/intersection level

## Appendix B.5 Random intercept multilevel negative binomial models of serious pedestrian injuries by segment/intersection in the Philadelphia region

|                                                 | Control levels               |                   |                   |                   |                   |                   |
|-------------------------------------------------|------------------------------|-------------------|-------------------|-------------------|-------------------|-------------------|
|                                                 | None                         | Demographics      | Roadway           | Exposure          | Land use          | Full              |
|                                                 | Estimate<br>(standard error) |                   |                   |                   |                   |                   |
| <i>Population density (log) in Philadelphia</i> | 0.03<br>(0.05)               | -0.07<br>(0.05)   | 0.05<br>(0.06)    | 0.02<br>(0.06)    | 0.02<br>(0.06)    | 0.02<br>(0.06)    |
| <i>Population density (log) in suburbs</i>      | 0.62***<br>(0.07)            | 0.48***<br>(0.08) | 0.59***<br>(0.08) | 0.50***<br>(0.08) | 0.46***<br>(0.09) | 0.46***<br>(0.09) |
| <i>Proportion of black residents (log)</i>      |                              | 0.06<br>(0.05)    | 0.06<br>(0.05)    | 0.06<br>(0.05)    | 0.05<br>(0.05)    | 0.05<br>(0.05)    |
| <i>Proportion of families in poverty (log)</i>  |                              | 0.26***<br>(0.08) | 0.27***<br>(0.07) | 0.28***<br>(0.08) | 0.25**<br>(0.08)  | 0.24**<br>(0.08)  |
| <i>Proportion of residents over 64 (log)</i>    |                              | -0.02<br>(0.11)   | -0.04<br>(0.11)   | -0.03<br>(0.11)   | -0.02<br>(0.11)   | -0.02<br>(0.11)   |
| <i>Jobs per acre (log)</i>                      |                              |                   |                   |                   |                   | -0.02<br>(0.07)   |
| <i>Land use diversity</i>                       |                              |                   |                   |                   | 0.13*             | 0.13*             |

|                                                            |          |          |           |           |           |
|------------------------------------------------------------|----------|----------|-----------|-----------|-----------|
|                                                            |          |          |           | (0.06)    | (0.06)    |
| <i>Public school enrollments</i>                           |          |          |           | -0.01     | -0.02     |
| <i>(log)</i>                                               |          |          |           | (0.01)    | (0.01)    |
| <i>Street link-to-node ratio</i>                           |          |          |           | -0.73**   | -0.74**   |
|                                                            |          |          |           | (0.27)    | (0.27)    |
| <i>Pedestrian exposure (log)</i>                           |          | 0.25***  |           | 0.24***   | 0.25**    |
|                                                            |          | (0.07)   |           | (0.07)    | (0.09)    |
| Average annual daily traffic (log)                         |          | 0.31***  |           | 0.31***   | 0.31***   |
|                                                            |          | (0.03)   |           | (0.03)    | (0.03)    |
| Speed limit (reference category: 25 mph and low frequency) |          |          |           |           |           |
| None available                                             |          | -0.01    | -0.08     | -0.09     | -0.09     |
|                                                            |          | (0.22)   | (0.22)    | (0.22)    | (0.22)    |
| 35 mph                                                     |          | 0.94***  | 0.74***   | 0.73***   | 0.73***   |
|                                                            |          | (0.10)   | (0.10)    | (0.10)    | (0.10)    |
| 45 mph                                                     |          | 0.68     | 0.30      | 0.30      | 0.30      |
|                                                            |          | (0.60)   | (0.60)    | (0.60)    | (0.60)    |
| 55 & 65 mph                                                |          | 1.53***  | 0.88***   | 0.87***   | 0.87***   |
|                                                            |          | (0.21)   | (0.21)    | (0.21)    | (0.21)    |
| Roadway segment length (in feet)                           |          | 0.81***  | 0.83***   | 0.83***   | 0.83***   |
|                                                            |          | (0.07)   | (0.07)    | (0.07)    | (0.07)    |
| Length (in feet) of limited access highways (log)          |          | -0.05    | -0.11*    | -0.11*    | -0.11*    |
|                                                            |          | (0.05)   | (0.05)    | (0.05)    | (0.05)    |
| Length (in feet) of secondary highways (log)               |          | 0.14***  | 0.09**    | 0.09**    | 0.09**    |
|                                                            |          | (0.03)   | (0.03)    | (0.03)    | (0.03)    |
| Length (in feet) of major arterials (log)                  |          | 0.09***  | 0.06*     | 0.06*     | 0.06*     |
|                                                            |          | (0.03)   | (0.03)    | (0.03)    | (0.03)    |
| Length (in feet) of secondary highways: one way (log)      |          | 0.03     | 0.05      | 0.04      | 0.04      |
|                                                            |          | (0.05)   | (0.05)    | (0.05)    | (0.05)    |
| Length (in feet) of major arterials: one way (log)         |          | 0.03     | 0.02      | 0.01      | 0.02      |
|                                                            |          | (0.05)   | (0.05)    | (0.05)    | (0.05)    |
| AADT missing dummy                                         |          | -2.03*** | 0.08      | 0.09      | 0.09      |
|                                                            |          | (0.51)   | (0.54)    | (0.54)    | (0.54)    |
| Intersection dummy                                         |          | 5.37***  | 5.24***   | 5.25***   | 5.24***   |
|                                                            |          | (0.45)   | (0.45)    | (0.45)    | (0.45)    |
| Philadelphia intercept                                     | 2.17***  | 1.87***  | 1.91***   | 1.46***   | 1.29***   |
|                                                            | (0.21)   | (0.22)   | (0.23)    | (0.25)    | (0.26)    |
| Constant                                                   | -7.39*** | -7.68*** | -13.37*** | -17.13*** | -15.65*** |
|                                                            | (0.13)   | (0.37)   | (0.61)    | (0.81)    | (0.93)    |
| AIC                                                        | 8,573    | 8,553    | 8,021     | 7,853     | 7,848     |
| BIC                                                        | 8,636    | 8,647    | 8,239     | 8,093     | 8,119     |
|                                                            |          |          |           |           |           |

Significance levels: < 0.001 \*\*\*, < 0.01 \*\*, < 0.05 \*

Variables in italic are measured on Census tract level as opposed to segment/intersection level

## Appendix B.6 Random intercept multilevel negative binomial models of pedestrian fatalities by segment/intersection in the Philadelphia region

|                                                 | Control levels               |                    |                  |                  |                  |                 |
|-------------------------------------------------|------------------------------|--------------------|------------------|------------------|------------------|-----------------|
|                                                 | None                         | Demographics       | Roadway          | Exposure         | Land use         | Full            |
|                                                 | Estimate<br>(standard error) |                    |                  |                  |                  |                 |
| <i>Population density (log) in Philadelphia</i> | -0.16***<br>(0.05)           | -0.27***<br>(0.06) | -0.14*<br>(0.06) | -0.13*<br>(0.06) | -0.10<br>(0.06)  | -0.11<br>(0.06) |
| <i>Population density (log) in suburbs</i>      | 0.32**<br>(0.10)             | 0.20*<br>(0.10)    | 0.33**<br>(0.11) | 0.32**<br>(0.12) | 0.32**<br>(0.12) | 0.26*<br>(0.13) |



|                                                            |                    |                    |                     |                     |                     |
|------------------------------------------------------------|--------------------|--------------------|---------------------|---------------------|---------------------|
| <i>Proportion of black residents (log)</i>                 | 0.11<br>(0.08)     | 0.10<br>(0.08)     | 0.11<br>(0.08)      | 0.10<br>(0.08)      | 0.12<br>(0.08)      |
| <i>Proportion of families in poverty (log)</i>             | 0.22<br>(0.11)     | 0.24*<br>(0.11)    | 0.23*<br>(0.11)     | 0.14<br>(0.11)      | 0.17<br>(0.11)      |
| <i>Proportion of residents over 64 (log)</i>               | 0.10<br>(0.14)     | 0.03<br>(0.14)     | 0.004<br>(0.14)     | 0.01<br>(0.14)      | 0.01<br>(0.14)      |
| <i>Jobs per acre (log)</i>                                 |                    |                    |                     |                     | 0.13<br>(0.10)      |
| <i>Land use diversity</i>                                  |                    |                    |                     | 0.22**<br>(0.08)    | 0.16<br>(0.09)      |
| <i>Public school enrollments (log)</i>                     |                    |                    |                     | 0.01<br>(0.02)      | 0.02<br>(0.02)      |
| <i>Street link-to-node ratio</i>                           |                    |                    |                     | -0.52<br>(0.37)     | -0.44<br>(0.37)     |
| <i>Pedestrian exposure (log)</i>                           |                    |                    | 0.07<br>(0.09)      | -0.004<br>(0.10)    | -0.11<br>(0.12)     |
| Average annual daily traffic (log)                         |                    |                    | 0.31***<br>(0.04)   | 0.31***<br>(0.04)   | 0.31***<br>(0.04)   |
| Speed limit (reference category: 25 mph and low frequency) |                    |                    |                     |                     |                     |
| None available                                             |                    | 0.56*<br>(0.26)    | 0.46<br>(0.26)      | 0.45<br>(0.26)      | 0.44<br>(0.26)      |
| 35 mph                                                     |                    | 0.88***<br>(0.15)  | 0.67***<br>(0.16)   | 0.65***<br>(0.16)   | 0.65***<br>(0.16)   |
| 45 mph                                                     |                    | 0.95<br>(0.63)     | 0.68<br>(0.63)      | 0.70<br>(0.63)      | 0.71<br>(0.63)      |
| 55 & 65 mph                                                |                    | 1.20***<br>(0.30)  | 0.71*<br>(0.30)     | 0.67*<br>(0.30)     | 0.66*<br>(0.30)     |
| Roadway segment length (in feet)                           |                    | 0.76***<br>(0.10)  | 0.78***<br>(0.10)   | 0.78***<br>(0.10)   | 0.79***<br>(0.10)   |
| Length (in feet) of limited access highways (log)          |                    | 0.09<br>(0.06)     | 0.02<br>(0.06)      | 0.02<br>(0.06)      | 0.02<br>(0.06)      |
| Length (in feet) of secondary highways (log)               |                    | 0.25***<br>(0.04)  | 0.21***<br>(0.04)   | 0.21***<br>(0.04)   | 0.21***<br>(0.04)   |
| Length (in feet) of major arterials (log)                  |                    | 0.14***<br>(0.04)  | 0.11**<br>(0.04)    | 0.11**<br>(0.04)    | 0.11**<br>(0.04)    |
| Length (in feet) of secondary highways: one way (log)      |                    | 0.04<br>(0.06)     | 0.04<br>(0.06)      | 0.04<br>(0.06)      | 0.04<br>(0.06)      |
| Length (in feet) of major arterials: one way (log)         |                    | 0.10<br>(0.06)     | 0.07<br>(0.07)      | 0.06<br>(0.07)      | 0.06<br>(0.07)      |
| AADT missing dummy                                         |                    | -1.77**<br>(0.59)  | 0.40<br>(0.65)      | 0.38<br>(0.65)      | 0.37<br>(0.65)      |
| Intersection dummy                                         |                    | 5.22***<br>(0.63)  | 5.09***<br>(0.63)   | 5.11***<br>(0.63)   | 5.15***<br>(0.63)   |
| Philadelphia intercept                                     | 2.22***<br>(0.23)  | 1.98***<br>(0.25)  | 1.98***<br>(0.26)   | 1.81***<br>(0.30)   | 1.76***<br>(0.32)   |
| Constant                                                   | -7.75***<br>(0.17) | -8.39***<br>(0.48) | -13.87***<br>(0.83) | -16.35***<br>(1.10) | -14.85***<br>(1.27) |
| AIC                                                        | 4,330              | 4,324              | 4,048               | 3,974               | 3,971               |
| BIC                                                        | 4,392              | 4,418              | 4,267               | 4,214               | 4,252               |

Significance levels: < 0.001 \*\*\*, < 0.01 \*\*, < 0.05 \*

Variables in italic are measured on Census tract level as opposed to segment/intersection level
